# Supplementary material for: BTG1 might be employed as a biomarker for carcinogenesis and a target for gene therapy in colorectal cancers
Source: PubMed Central journal article supplement (PMC5352338; doi:10.18632/oncotarget.10649), 2016-07-18
Supplement: oncotarget-08-7502-s001.pdf [file oncotarget-08-7502-s001.pdf]

## BTG1 might be employed as a biomarker for carcinogenesis and a target for gene therapy in colorectal cancers

### SUPPLEMENTARY TABLES

Supplementary Table S1: The primers used in Real-time RT-PCR

| Names            | Primer's sequence                                                | Distribution              | AT (°C) | Product size(bp) | Extension time(s) |
|------------------|------------------------------------------------------------------|---------------------------|---------|------------------|-------------------|
| <i>Cyclin B1</i> | F: 5'-GTTATGCAGCACCTG-3'<br>R: 5'-CTTGGCTAAATCTTGAAC-3'          | NM_001088590<br>1388-1537 | 60      | 150              | 34                |
| <i>Cyclin E1</i> | F: 5'-GGATGTTGACTGCCTTGA-3'<br>R: 5'-CGCACCACTGATACCCT-3'        | BA000005<br>1044-1150     | 60      | 107              | 34                |
| <i>Cdc2</i>      | F: 5'-GGGCACTCCCAATAA-3'<br>R: 5'-GATGCTAGGCTTCCTG-3'            | XM_572099<br>631-723      | 60      | 93               | 34                |
| <i>Bcl-2</i>     | F: 5'-GCCTTCTTTGAGTTCGGTGGG-3'<br>R: 5'-TGTGCAGGTGCCGGTTCAG-3'   | DQ926871<br>938-1052      | 60      | 115              | 34                |
| <i>Bax</i>       | F: 5'-GATTGCCCGCGTGGAC-3'<br>R: 5'-GCCCCAGTTGAAGTTGC-3'          | DQ926869<br>306-393       | 60      | 88               | 34                |
| <i>Bcl-xL</i>    | F: 5'-GGCAACCCATCCTGGCACCT-3'<br>R: 5'-AACTCGTCGCCTGCCTCCCT-3'   | AY263145<br>118-276       | 60      | 159              | 34                |
| <i>Akt1</i>      | F: 5'-TCTTTGCCGGTATCGTGT-3'<br>R: 5'-TGTCATCTTGGTCAGGTGGT-3'     | F283818S13<br>1559-1708   | 60      | 150              | 34                |
| <i>P21</i>       | F: 5'-ACTGTCTTGTACCCTTGTGCC-3'<br>R: 5'-AAATCTGTCATGCTGGTCTGC-3' | XM_003950827<br>572-679   | 60      | 108              | 34                |
| <i>P27</i>       | F: 5'-GGCTCCGGCTAACTCTGA-3'<br>R: 5'-TTCTTCTGTTCTGTTGGCTCTT-3'   | XM_522347<br>1081-1237    | 60      | 157              | 34                |
| <i>GRP78</i>     | F: 5'-GTTCTTGCCGTTCAAGGTGG-3'<br>R: 5'-TGGTACAGTAACAACCTGCATG-3' | FJ436356<br>600-780       | 60      | 181              | 34                |
| <i>BCRP</i>      | F: 5'-GACAGCTTCCAATGACCTGAA-3'<br>R: 5'-CAGGATGGCGTTGAGACC-3'    | XM_005263356<br>285-456   | 60      | 172              | 34                |
| <i>MRP1</i>      | F: 5'-TTTCAGAACACGGTCCTCG-3'<br>R: 5'-TGGGCTGACCAGAAACACT-3'     | XM_005255327<br>190-423   | 60      | 234              | 34                |
| <i>GSTπ</i>      | F: 5'-CGGGCAAGGATGACTATGTGA-3'<br>R: 5'-GGGCTAGGACCTCATGGATCA-3' | XM_001152516<br>585-746   | 60      | 162              | 34                |
| <i>β-catenin</i> | F: 5'-GCTTGAATGAGACTGCTGA-3'<br>R: 5'-CTGGCCATATCCACCAGAGT-3'    | X87838<br>2221-2334       | 60      | 114              | 34                |
| <i>cyclin D1</i> | F: 5'-TGCCACAGATGTGAAGTTCATT-3'<br>R: 5'-CAGTCCGGGTCACACTTGAT-3' | NG_000002<br>776-937      | 60      | 162              | 34                |
| <i>Survivin</i>  | F: 5'-TTCTCAAGGACCACCGCATC-3'<br>R: 5'-AGCCTTCCAGCTCCTTGAAG-3'   | DQ508252<br>159-320       | 60      | 162              | 34                |
| <i>IL-2</i>      | F: 5'-GACTTTACTGCTGGATTT-3'<br>R: 5'-ATTGCTGATTAAGTCCCT-3'       | NM_000586.3<br>160-379    | 60      | 220              | 34                |
| <i>IL-4</i>      | F: 5'-CAGTTCTACAGCCACCAT-3'<br>R: 5'-CTGGTTGGCTTCCTTCAC-3'       | NM_172348.2<br>249-407    | 60      | 159              | 34                |
| <i>IL-17</i>     | F: 5'-GAAGGCAGGAATCACAAT-3'<br>R: 5'-ATCGGTTGTAGTAATCTG-3'       | NM_002190.2<br>108-253    | 60      | 146              | 34                |
| <i>GAPDH</i>     | F: 5'-CAATGACCCCTTCATTGACC-3'<br>R: 5'-TGGAAGATGGTGTATGGGATT-3'  | NM_002046.3<br>201-335    | 60      | 135              | 34                |

AT=annealing temperature.

**Supplementary Table S2: Antibodies' used in Western blot**

| <b>Names</b>                                   | <b>Source</b> | <b>Company</b>            |
|------------------------------------------------|---------------|---------------------------|
| Cyclin B1 (GNS1)                               | Mouse         | Santa Cruz Biotech. Inc.  |
| Cyclin D1 (H-295)                              | Rabbit        | Santa Cruz Biotech. Inc.  |
| CyclinE1 (HE12)                                | Rabbit        | Santa Cruz Biotech. Inc.  |
| Cdc2 p34 (B-6)                                 | Mouse         | Santa Cruz Biotech. Inc.  |
| Cdk4 (C-22)                                    | Rabbit        | Santa Cruz Biotech. Inc.  |
| Cdc25B (C-20)                                  | Rabbit        | Santa Cruz Biotech. Inc.  |
| P53 (FL-393)                                   | Rabbit        | Santa Cruz Biotech. Inc.  |
| Bcl-2 (C 21)                                   | Rabbit        | Santa Cruz Biotech. Inc.  |
| Bax (B-9)                                      | Mouse         | Santa Cruz Biotech. Inc.  |
| AIF(E-1)                                       | Mouse         | Santa Cruz Biotech. Inc.  |
| XIAP(H-202)                                    | Rabbit        | Santa Cruz Biotech. Inc.  |
| Atg14                                          | Rabbit        | Abcam                     |
| Beclin 1                                       | Rabbit        | Abcam                     |
| Atg7 (N-20)                                    | Goat          | Santa Cruz Biotech. Inc.  |
| $\beta$ -catenin (C-18)                        | Goat          | Santa Cruz Biotech. Inc.  |
| Phospho- $\beta$ -catenin (Y142)               | Rabbit        | Abcam                     |
| P38 $\alpha$ / $\beta$ (H-147)                 | Rabbit        | Santa Cruz Biotech. Inc.  |
| Phospho-p38 $\alpha$ / $\beta$ (Thr180/Tyr182) | Rabbit        | Santa Cruz Biotech. Inc.  |
| Ki67                                           | Rabbit        | Abcam                     |
| LC3B                                           | Rabbit        | Cell signaling technology |
| BTG1                                           | Rabbit        | Proteintech               |
| $\beta$ -actin (C-4)                           | Mouse         | Santa Cruz Biotech. Inc.  |
| GAPDH                                          | Mouse         | Santa Cruz Biotech. Inc.  |
